# Supplementary material for: Comparative Genomic Analysis Reveals Genetic Variations in Multiple Primary Esophageal Squamous Cell Carcinoma of Chinese Population
Source: Front Oncol. 2022 Apr 20;12:868301. doi: 10.3389/fonc.2022.868301 (PMC9065449; doi:10.3389/fonc.2022.868301)
Supplement: Table S3 — TP53 somatic mutations detected in all ESCC samples. [file Table_3.xlsx]

## Sheet: Sheet 1
Table S3. TP53 somatic mutations detected in all ESCC samples.
Group	Hugo_Symbol	NCBI_Build	Chromosome	Start_Position	End_Position	Strand	Variant_Classification	Variant_Type	Reference_Allele	Tumor_Seq_Allele1	Tumor_Seq_Allele2	HGVSc	HGVSp	Allele frequency	ClinVar pathogenicity interpretation
P1-Tumor 1	TP53	GRCh37	17	7578213	7578214	+	Frame_Shift_Del	DEL	AA	-	-	c.635_636del	p.Phe212SerfsTer3	0.8085	Pathogenic
P1-Tumor 2	TP53	GRCh37	17	7577100	7577100	+	Missense_Mutation	SNP	T	T	C	c.838A>G	p.Arg280Gly	0.0313	Conflicting interpretations of pathogenicity
P1-Tumor 2	TP53	GRCh37	17	7579463	7579464	+	Frame_Shift_Ins	INS	-	-	T	c.223_224insA	p.Pro75HisfsTer74	0.0359	N/A
P1-Tumor 2	TP53	GRCh37	17	7578535	7578535	+	Missense_Mutation	SNP	T	T	C	c.395A>G	p.Lys132Arg	0.0536	VUS
P1-Tumor 2	TP53	GRCh37	17	7578235	7578235	+	Missense_Mutation	SNP	T	T	C	c.614A>G	p.Tyr205Cys	0.0302	Likely pathogenic
P1-Tumor 2	TP53	GRCh37	17	7578413	7578414	+	Frame_Shift_Ins	INS	-	-	A	c.516dup	p.Val173CysfsTer8	0.2817	N/A
P1-PNM	TP53	GRCh37	17	7578435	7578436	+	Frame_Shift_Ins	INS	-	-	T	c.494dup	p.Ser166ValfsTer15	0.1623	N/A
P1-PNM	TP53	GRCh37	17	7578496	7578496	+	Missense_Mutation	SNP	A	A	C	c.434T>G	p.Leu145Arg	0.0218	VUS
P2-Tumor 1	TP53	GRCh37	17	7577543	7577543	+	Missense_Mutation	SNP	C	C	A	c.738G>T	p.Met246Ile	0.2203	VUS
P2-Tumor 1	TP53	GRCh37	17	7577105	7577105	+	Missense_Mutation	SNP	G	G	C	c.833C>G	p.Pro278Arg	0.2349	VUS
P2-Tumor 2	TP53	GRCh37	17	7577106	7577106	+	Missense_Mutation	SNP	G	G	A	c.832C>T	p.Pro278Ser	0.0435	Conflicting interpretations of pathogenicity​
P2-Tumor 2	TP53	GRCh37	17	7577103	7577113	+	Frame_Shift_Del	DEL	CAGGACAGGCA	CAGGACAGGCA	-	c.825_835del	p.Cys275TrpfsTer27	0.061	N/A
P2-PNM	TP53	GRCh37	17	7576927	7576927	+	Splice_Site	SNP	C	C	T	c.920-1G>A		0.3067	Pathogenic/Likely pathogenic​
P3-PNM	TP53	GRCh37	17	7579349	7579349	+	Missense_Mutation	SNP	A	A	C	c.338T>G	p.Phe113Cys	0.049	VUS
P3-PNM	TP53	GRCh37	17	7578268	7578268	+	Missense_Mutation	SNP	A	A	C	c.581T>G	p.Leu194Arg	0.0546	Conflicting interpretations of pathogenicity
P3-PNM	TP53	GRCh37	17	7578236	7578236	+	Missense_Mutation	SNP	A	A	C	c.613T>G	p.Tyr205Asp	0.0652	VUS
P3-PNM	TP53	GRCh37	17	7577545	7577545	+	Missense_Mutation	SNP	T	T	C	c.736A>G	p.Met246Val	0.0484	Pathogenic​
P3-PNM	TP53	GRCh37	17	7578271	7578271	+	Missense_Mutation	SNP	T	T	A	c.578A>T	p.His193Leu	0.0276	Conflicting interpretations of pathogenicity​
P3-Tumor 2	TP53	GRCh37	17	7578271	7578271	+	Missense_Mutation	SNP	T	T	A	c.578A>T	p.His193Leu	0.041	Conflicting interpretations of pathogenicity​
P4-PNM	TP53	GRCh37	17	7578410	7578410	+	Missense_Mutation	SNP	T	T	A	c.520A>T	p.Arg174Trp	0.0215	VUS
P4-Tumor 1	TP53	GRCh37	17	7577518	7577518	+	Missense_Mutation	SNP	T	T	A	c.763A>T	p.Ile255Phe	0.2642	VUS
P4-Tumor 2	TP53	GRCh37	17	7577096	7577096	+	Missense_Mutation	SNP	T	T	C	c.842A>G	p.Asp281Gly	0.3831	Pathogenic​
P5-Tumor 2	TP53	GRCh37	17	7577530	7577530	+	Missense_Mutation	SNP	T	T	A	c.751A>T	p.Ile251Phe	0.1154	Pathogenic (COSMIC)
P5-PNM	TP53	GRCh37	17	7578431	7578431	+	Nonsense_Mutation	SNP	G	G	A	c.499C>T	p.Gln167Ter	0.1447	Pathogenic/Likely pathogenic​
P6-Tumor 1	TP53	GRCh37	17	7577559	7577559	+	Missense_Mutation	SNP	G	G	C	c.722C>G	p.Ser241Cys	0.4167	Likely pathogenic​
P6-Tumor 2	TP53	GRCh37	17	7578400	7578400	+	Missense_Mutation	SNP	G	G	C	c.530C>G	p.Pro177Arg	0.7653	Pathogenic/Likely pathogenic​
P6-PNM	TP53	GRCh37	17	7578211	7578211	+	Missense_Mutation	SNP	C	C	G	c.638G>C	p.Arg213Pro	0.04	Pathogenic/Likely pathogenic
P6-PNM	TP53	GRCh37	17	7578446	7578446	+	Missense_Mutation	SNP	T	T	A	c.484A>T	p.Ile162Phe	0.0219	Pathogenic (COSMIC)
P7-Tumor 1	TP53	GRCh37	17	7578271	7578271	+	Missense_Mutation	SNP	T	T	A	c.578A>T	p.His193Leu	0.6101	Conflicting interpretations of pathogenicity​
P7-Tumor 1	TP53	GRCh37	17	7577548	7577548	+	Missense_Mutation	SNP	C	C	T	c.733G>A	p.Gly245Ser	0.0435	Pathogenic​
P7-Tumor 2	TP53	GRCh37	17	7578263	7578263	+	Nonsense_Mutation	SNP	G	G	A	c.586C>T	p.Arg196Ter	0.0382	Pathogenic​
P7-Tumor 2	TP53	GRCh37	17	7577046	7577046	+	Nonsense_Mutation	SNP	C	C	A	c.892G>T	p.Glu298Ter	0.0214	Pathogenic​
P7-Tumor 2	TP53	GRCh37	17	7579358	7579358	+	Missense_Mutation	SNP	C	C	A	c.329G>T	p.Arg110Leu	0.0276	Pathogenic/Likely pathogenic​
P7-PNM	TP53	GRCh37	17	7577120	7577120	+	Missense_Mutation	SNP	C	C	A	c.818G>T	p.Arg273Leu	0.0219	Pathogenic​
P7-PNM	TP53	GRCh37	17	7576852	7576852	+	Splice_Site	SNP	C	C	G	c.993+1G>C		0.1892	Pathogenic​
P8-Tumor 1	TP53	GRCh37	17	7578413	7578413	+	Missense_Mutation	SNP	C	C	A	c.517G>T	p.Val173Leu	0.6085	Pathogenic/Likely pathogenic​
P8-Tumor 2	TP53	GRCh37	17	7578413	7578413	+	Missense_Mutation	SNP	C	C	A	c.517G>T	p.Val173Leu	0.7311	Pathogenic/Likely pathogenic​
P8-PNM	TP53	GRCh37	17	7577124	7577124	+	Missense_Mutation	SNP	C	C	T	c.814G>A	p.Val272Met	0.0692	Pathogenic​
P9-Tumor	TP53	GRCh37	17	7576851	7576851	+	Splice_Site	SNP	A	A	T	c.993+2T>A		0.6717	Pathogenic (COSMIC)
P9-PNM	TP53	GRCh37	17	7578190	7578190	+	Missense_Mutation	SNP	T	T	C	c.659A>G	p.Tyr220Cys	0.0667	Pathogenic​
P9-PNM	TP53	GRCh37	17	7579358	7579358	+	Missense_Mutation	SNP	C	C	A	c.329G>T	p.Arg110Leu	0.1268	Pathogenic/Likely pathogenic​
P10-Tumor	TP53	GRCh37	17	7576927	7576927	+	Splice_Site	SNP	C	C	A	c.920-1G>T		0.0571	Pathogenic​
P10-Tumor	TP53	GRCh37	17	7577568	7577568	+	Missense_Mutation	SNP	C	C	T	c.713G>A	p.Cys238Tyr	0.0667	Pathogenic/Likely pathogenic​
P11-Tumor	TP53	GRCh37	17	7577538	7577538	+	Missense_Mutation	SNP	C	C	T	c.743G>A	p.Arg248Gln	0.4321	Pathogenic​
P12-Tumor	TP53	GRCh37	17	7579391	7579392	+	Frame_Shift_Ins	INS	-	-	AAGGGACAGAAGATGACAGGGGCCAGGAGGGGGCTGAGAAA	c.295_296insTTTCTCAGCCCCCTCCTGGCCCCTGTCATCTTCTGTCCCTT	p.Ser99PhefsTer38	0.0763	N/A
P12-PNM	TP53	GRCh37	17	7577120	7577120	+	Missense_Mutation	SNP	C	C	A	c.818G>T	p.Arg273Leu	0.0926	Pathogenic​
P13-Tumor	TP53	GRCh37	17	7578454	7578454	+	Missense_Mutation	SNP	G	G	T	c.476C>A	p.Ala159Asp	0.1676	VUS
P13-PNM	TP53	GRCh37	17	7578176	7578176	+	Splice_Site	SNP	C	C	A	c.672+1G>T		0.0221	Pathogenic/Likely pathogenic​
